# Supplementary material for: Unifying Candida antarctica lipase B and nZVI in bioinspired polymer nanomicelles: a nanobiohybrid synergy for sustainable synthesis of acetaminophen
Source: Royal Society of Chemistry journal article supplement (doi:10.1039/d4su00412d), 2024-01-01
Supplement: d4su00412d1.pdf [file d4su00412d1.pdf]

## **Unifying *Candida antarctica* Lipase B and nZVI in bioinspired polymer nanomicelles: A nanobiohybrid synergy for sustainable synthesis of acetaminophen**

**Falguni Shukla, Dilraj Singh, Sonal Thakore\***

Department of Chemistry, Faculty of Science, The Maharaja Sayajirao University of Baroda,  
Vadodara, 390002, India.

**\*Authors for correspondence E-mail:** [chemistry2797@yahoo.com](mailto:chemistry2797@yahoo.com), [sonal.thakore-chem@msubaroda.ac.in](mailto:sonal.thakore-chem@msubaroda.ac.in) (Thakore, S.)

### **Table of contents**

- 1. <sup>1</sup>H NMR of pre-polymer 1**
- 2. <sup>1</sup>H NMR of pre-polymer 2**
- 3. FTIR of pre-polymer 1**
- 4. FTIR of pre-polymer 2**
- 5. Mass spectrum of L-Tyrosine methyl ester**
- 6. FTIR of pre-polymer 3**
- 7. <sup>13</sup>C NMR of final amphiphilic polymer**
- 8. TGA profile of final amphiphilic polymer**
- 9. Zeta potential of nanomicelles solution after loading CALB enzyme**
- 10. Full scan XPS spectrum of enzyme nanoreactors**
- 11. Deconvoluted XPS spectra of C, N, O, and Fe present in the catalytic nanoreactor**
- 12. Calibration plot of BSA**
- 13. VSM analysis of nZVI-CALB@NM**
- 14. CD spectra**
- 15. UV- visible data showing control reaction in absence of iron nanoparticle**
- 16. UV-visible spectra**
- 17. Kinetics**
- 18. <sup>1</sup>H NMR of p-aminophenol**
- 19. FTIR of acetaminophen**
- 20. Mass analysis of acetaminophen**
- 21. HPLC analysis of standard acetaminophen**

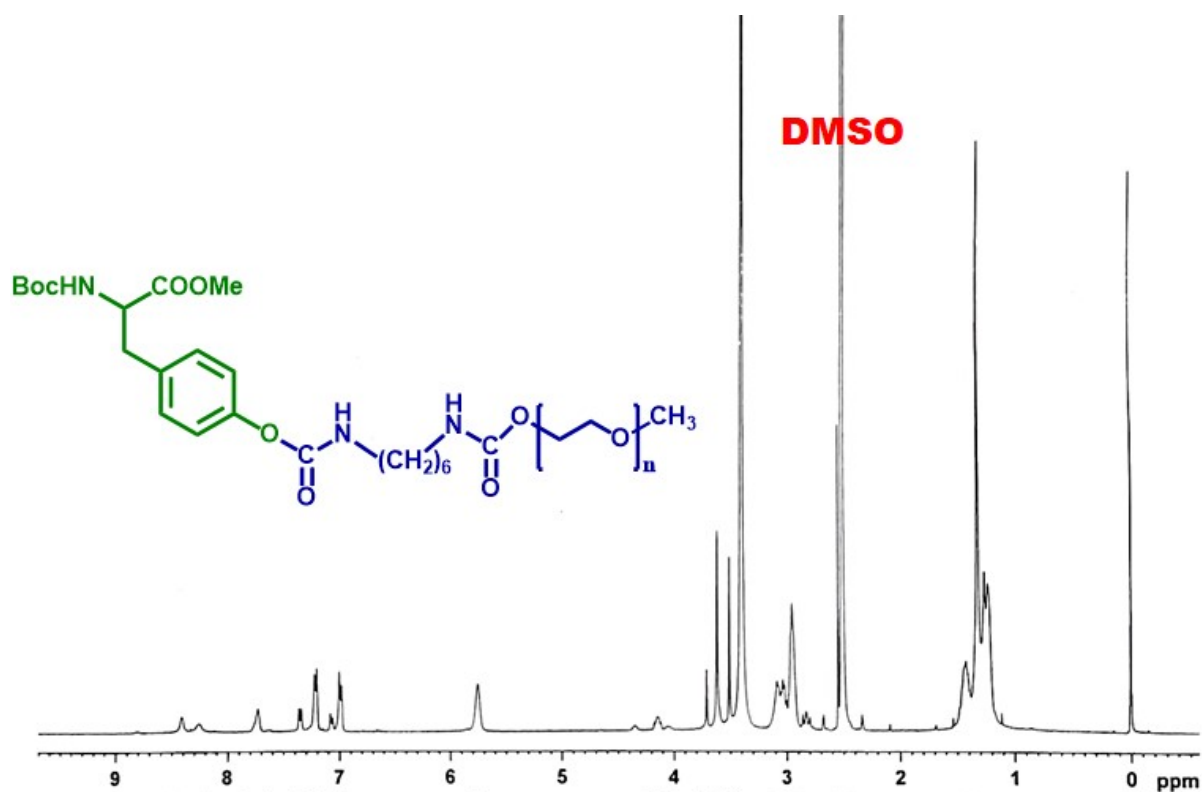

Figure S1:  $^1\text{H}$  NMR of pre-polymer 1

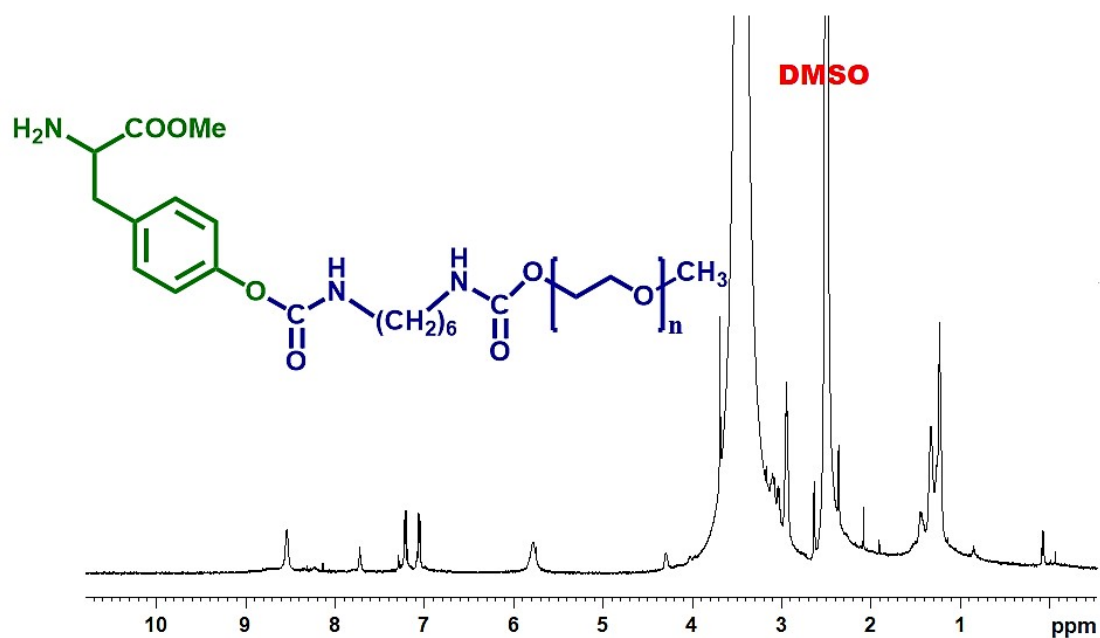

Figure S2:  $^1\text{H}$  NMR of pre-polymer 2

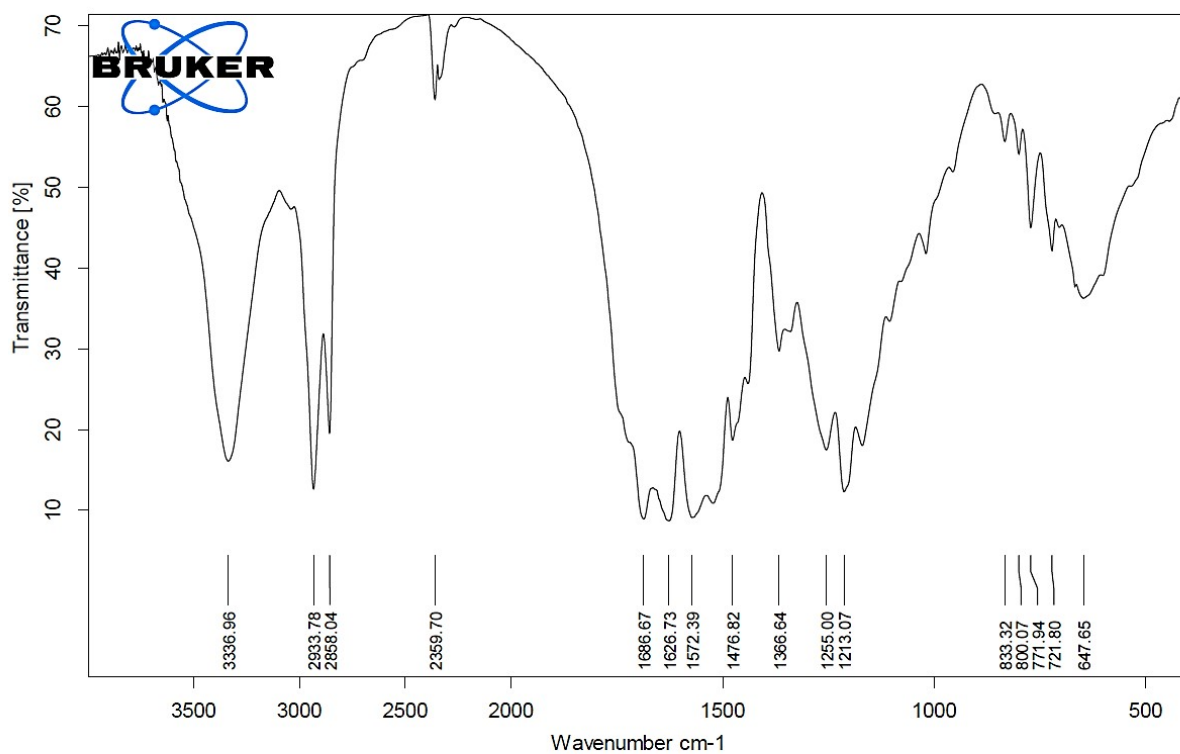

Figure S3: FTIR spectrum of Pre-polymer 1

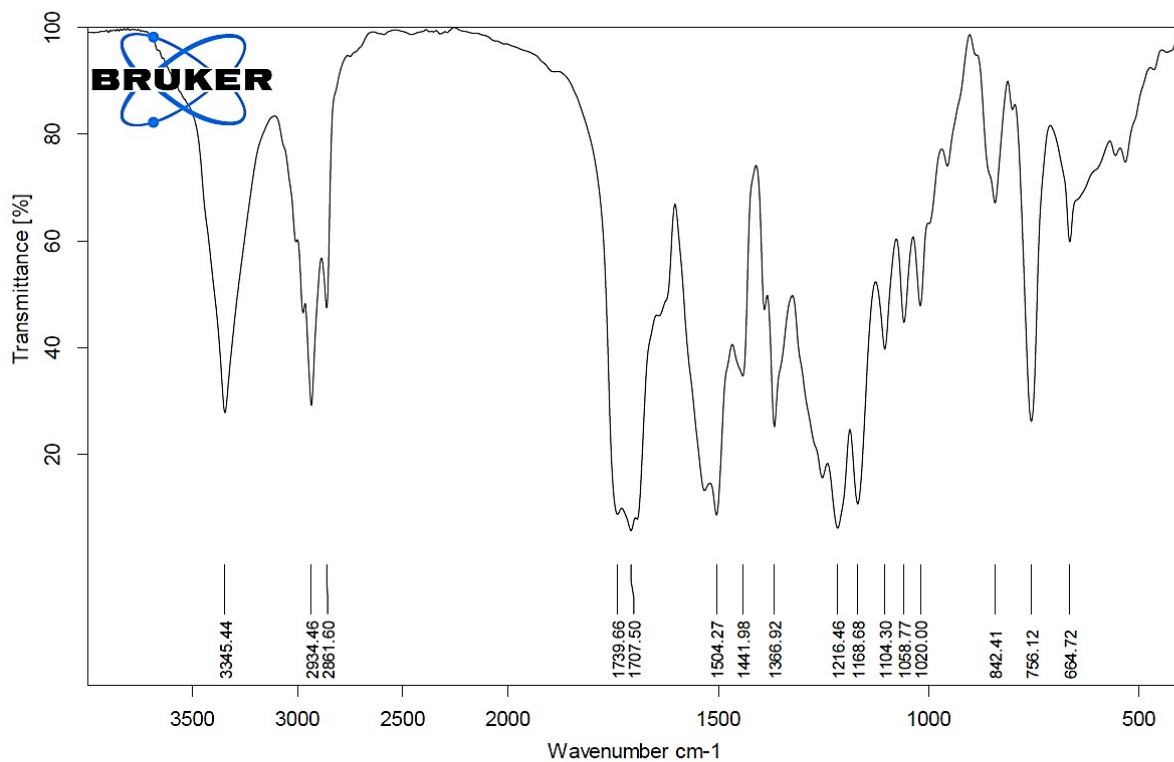

Figure S4: FTIR spectrum of Pre-polymer 2

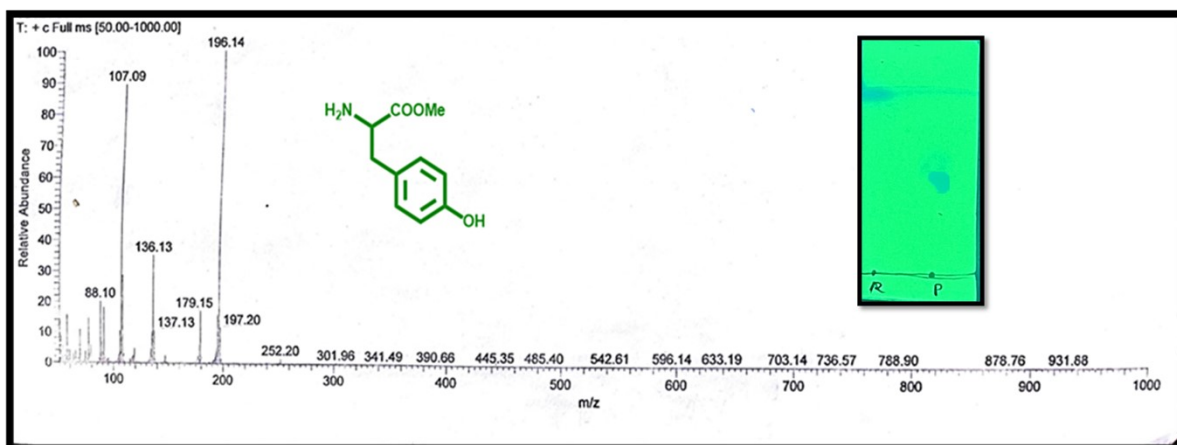

**Figure S5:** Mass spectrum of L-Tyrosine methyl ester (Inset: TLC plate showing the successful deprotection of Boc group under given reaction conditions; Spot 1(R): Boc-L-tyrosine methyl ester and Spot 2(P) L-Tyrosine methyl ester))

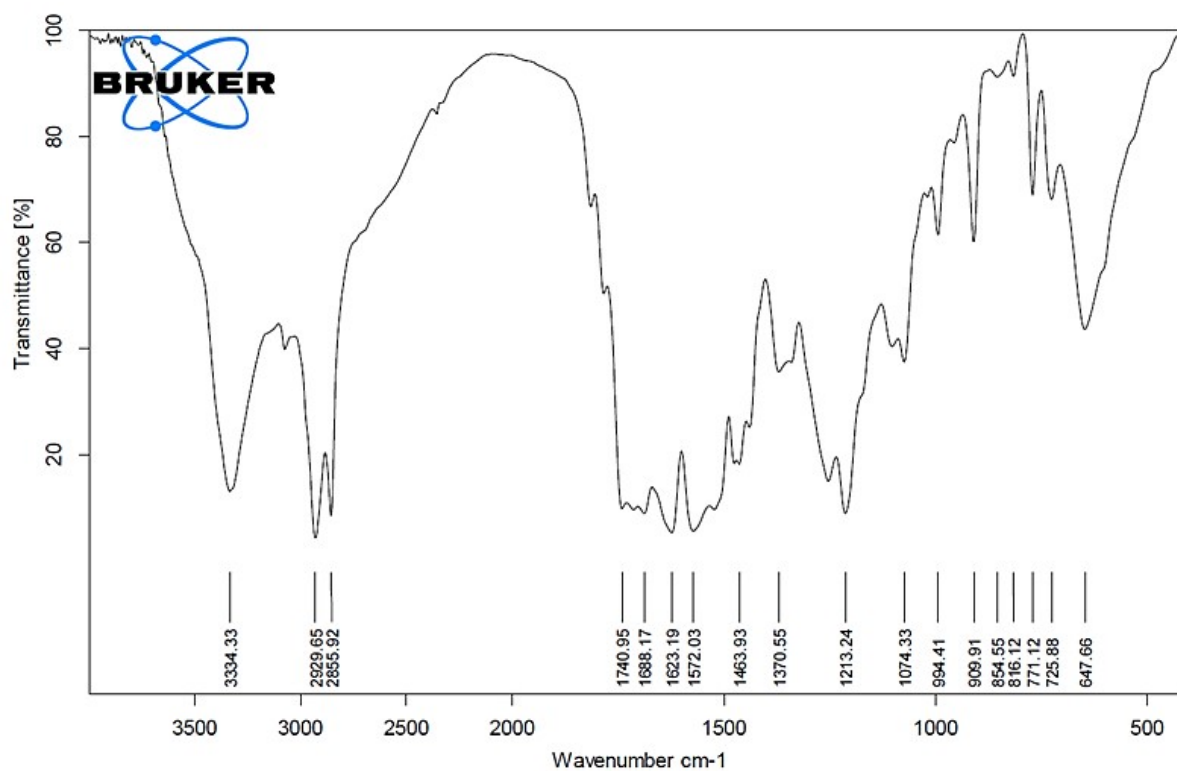

**Figure S6:** FTIR spectrum of Pre-polymer 3

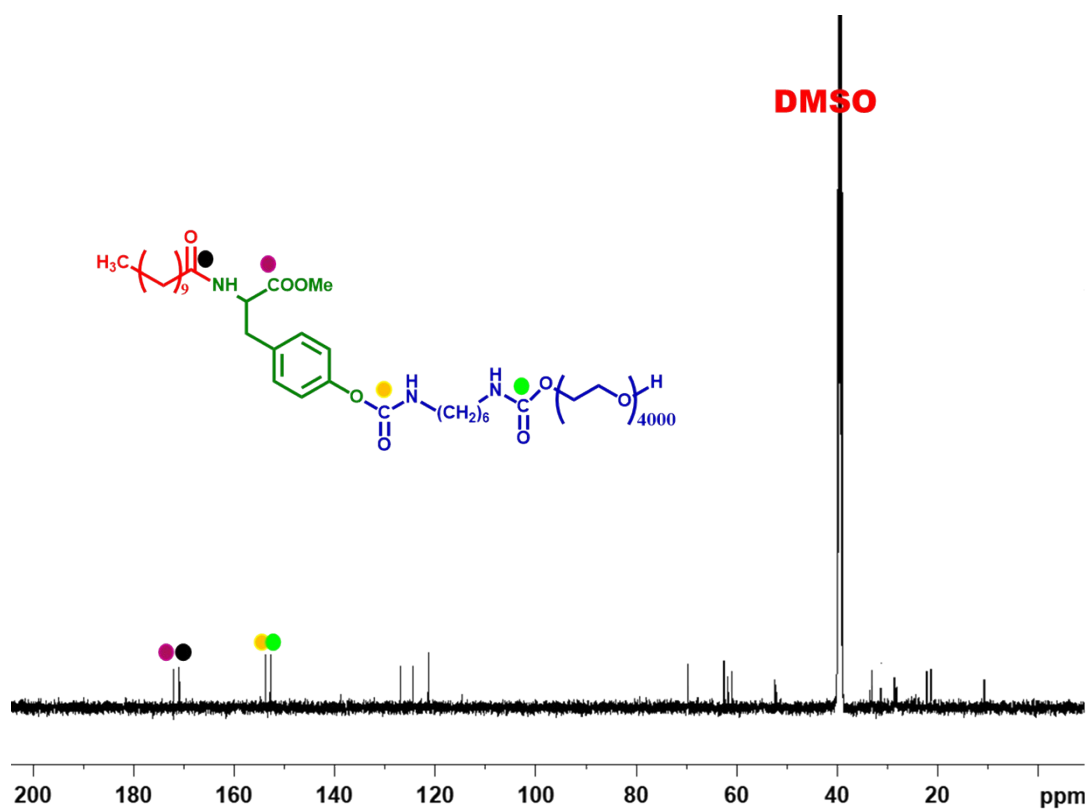

Figure S7:  $^{13}\text{C}$  NMR of final amphiphilic polymer

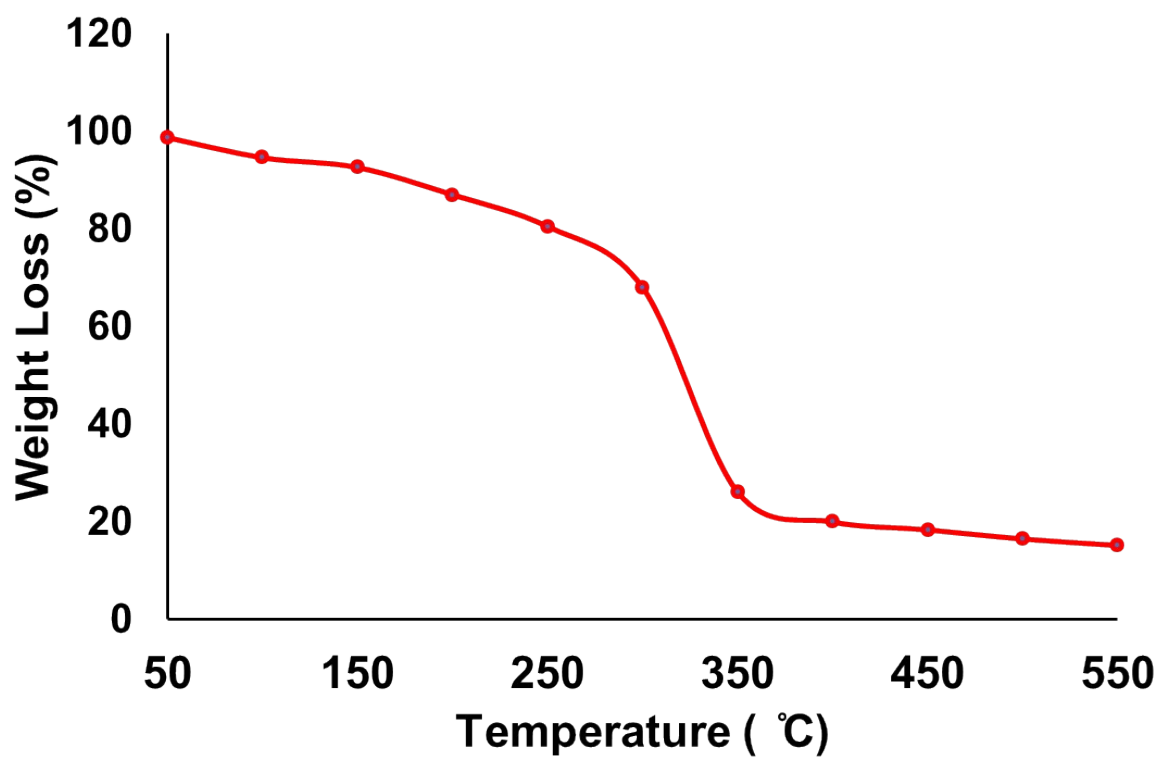

**Figure S8:** TGA profile of final amphiphilic polymer

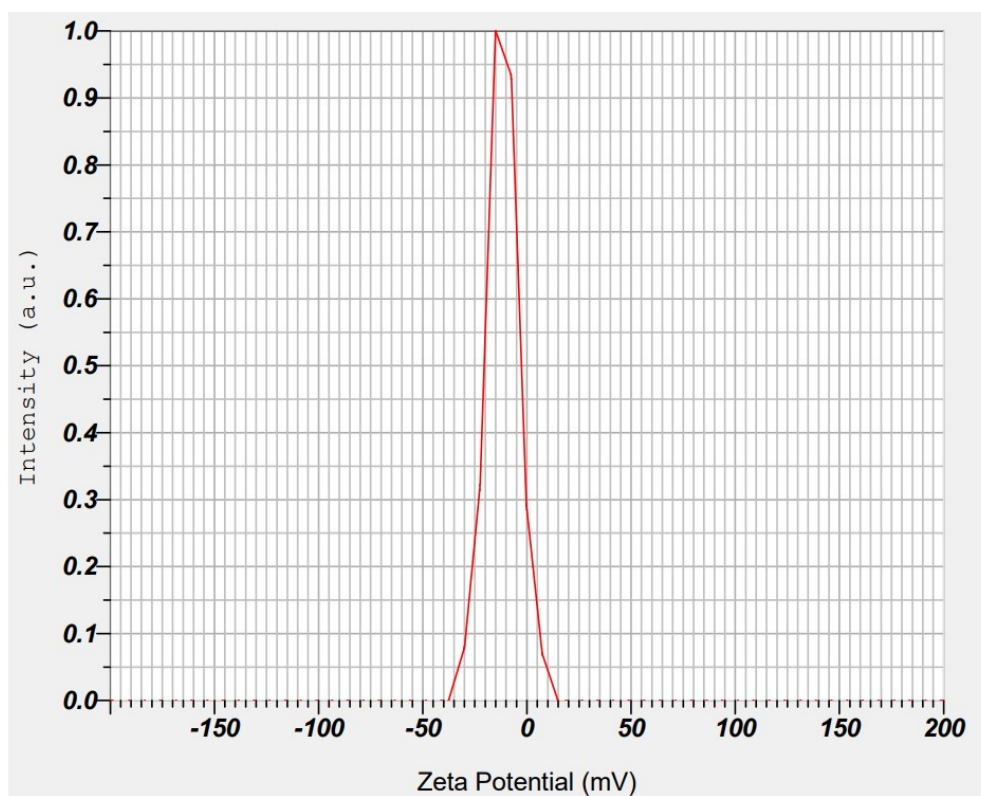

**Figure S9:** Zeta potential of nanomicelles solution after loading CALB enzyme

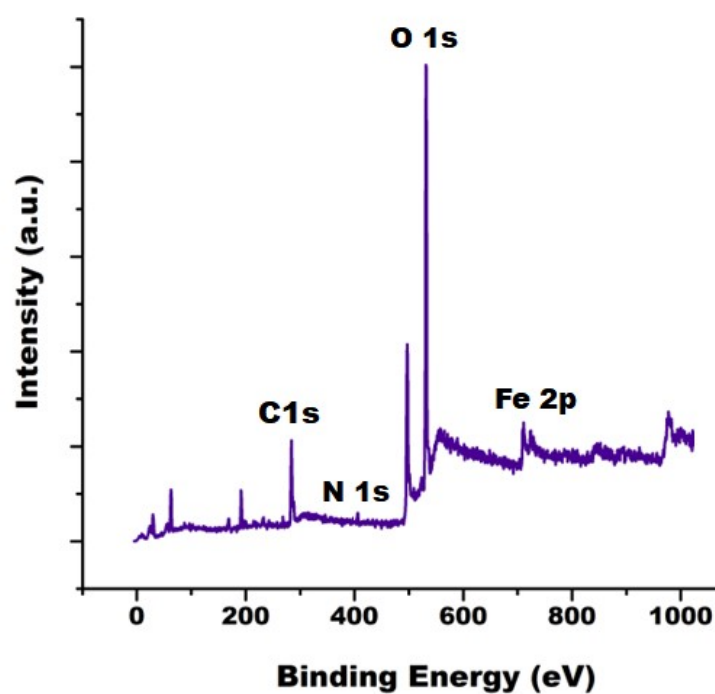

**Figure S10:** Full scan XPS spectrum of nanoreactors (solution was dried into powder form).

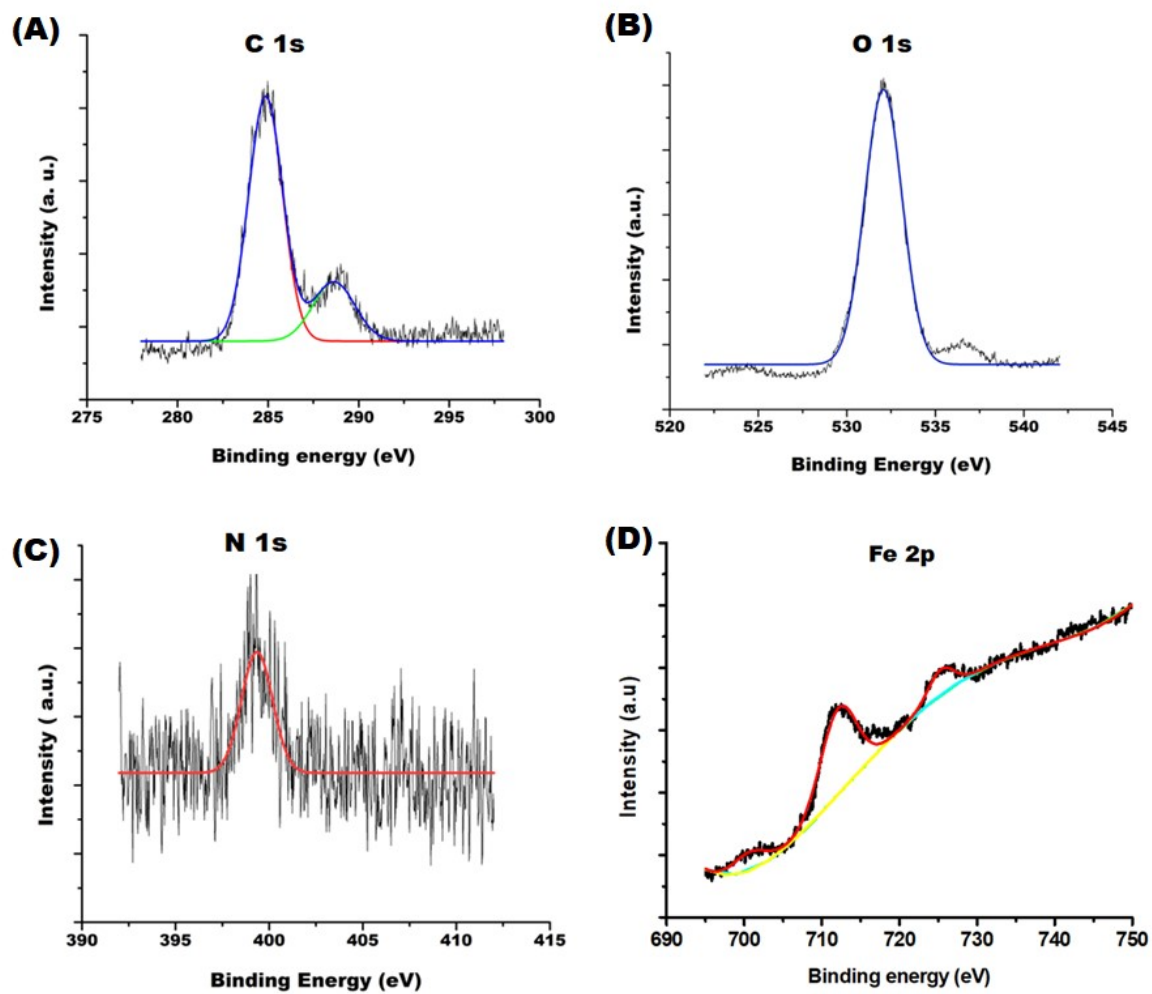

**Figure S11:** Deconvoluted spectra of enzyme nanoreactor (A) C 1s (B) O 1s (C) N 1s and (D) Fe 2p.

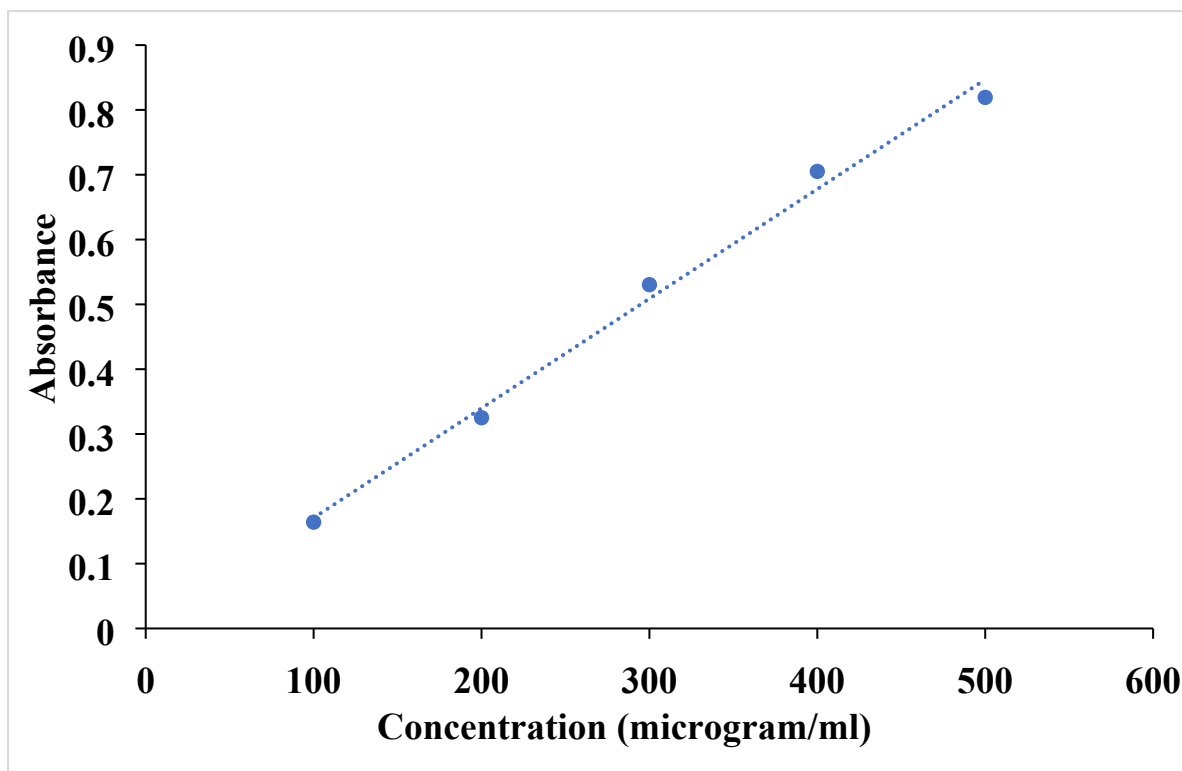

Figure S12: Calibration plot of BSA

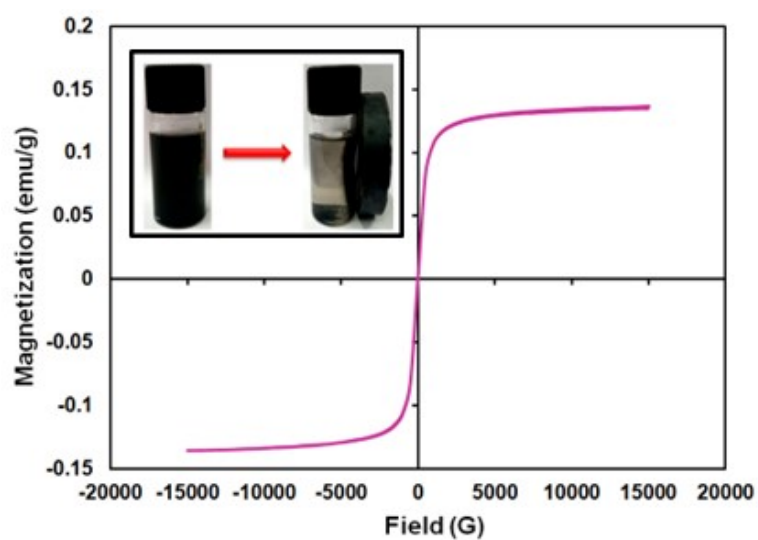

Figure S13: Evaluation of magnetic property via room-temperature magnetization curve



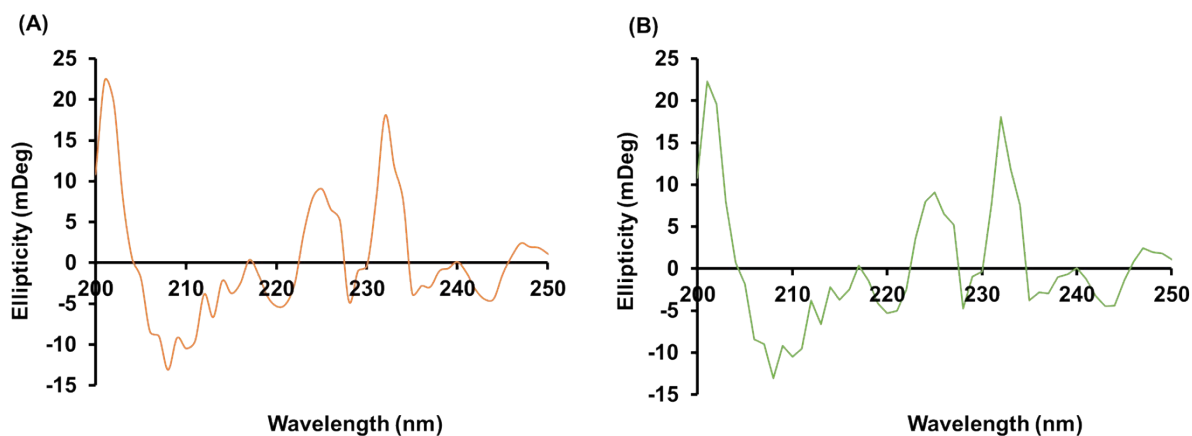

**Figure S14:** Circular Dichroism spectra of (A) Free CALB and (b) nZVI-CALB@NM.

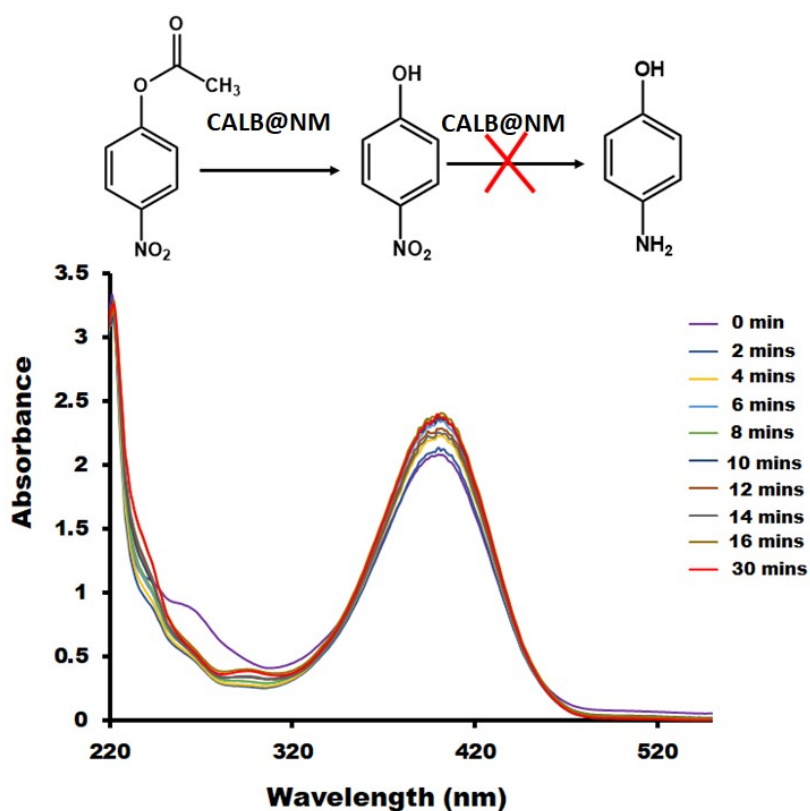

**Figure S15:** UV-Visible spectrum showing the 4-NP formation from 4-NPA in presence of CALB and formation of 4-AP does not occur in absence of nZVI nanoparticles.

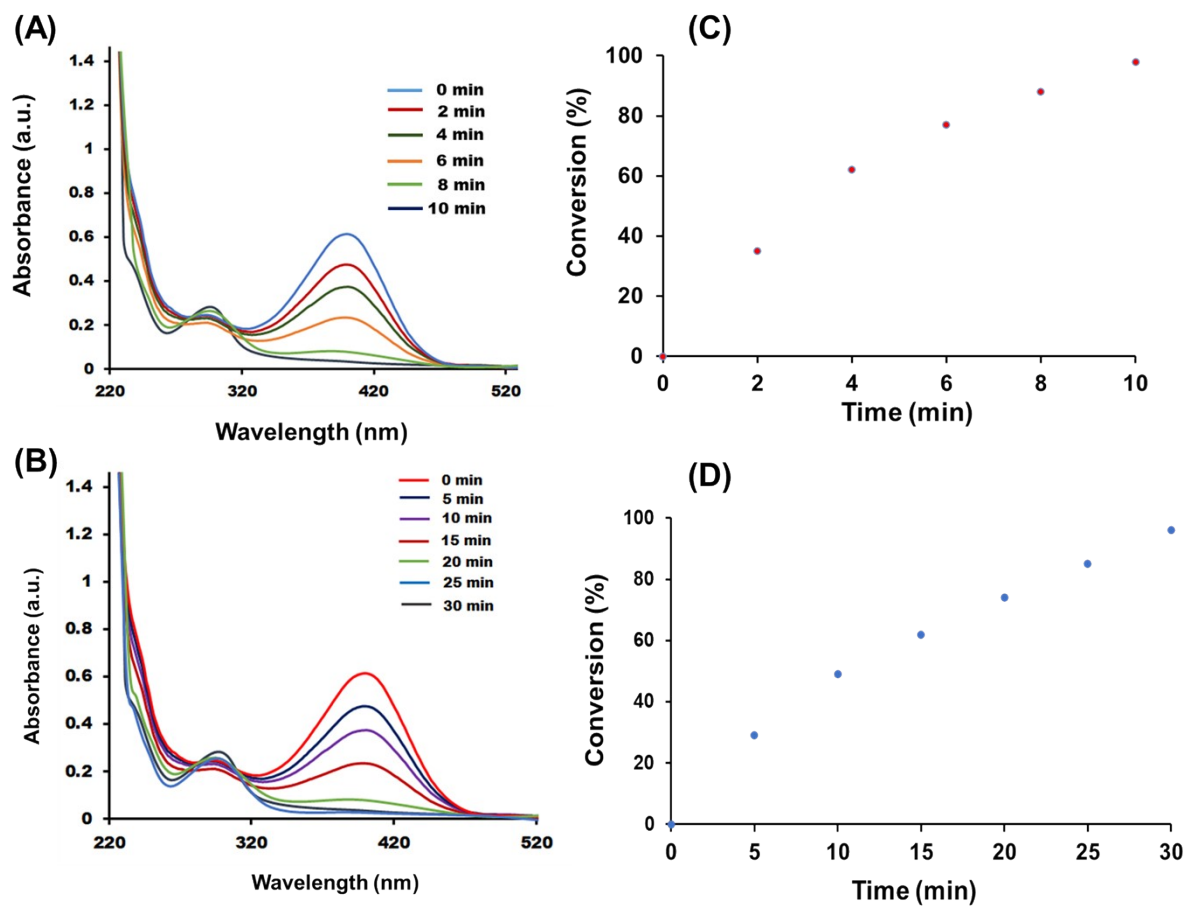

**Figure S16:** The time dependent UV–visible absorption spectra of 4-NP reduction step and conversion % in presence of nanomicelles (A, C) and in absence of nanomicelles (B, D) at 35 °C.

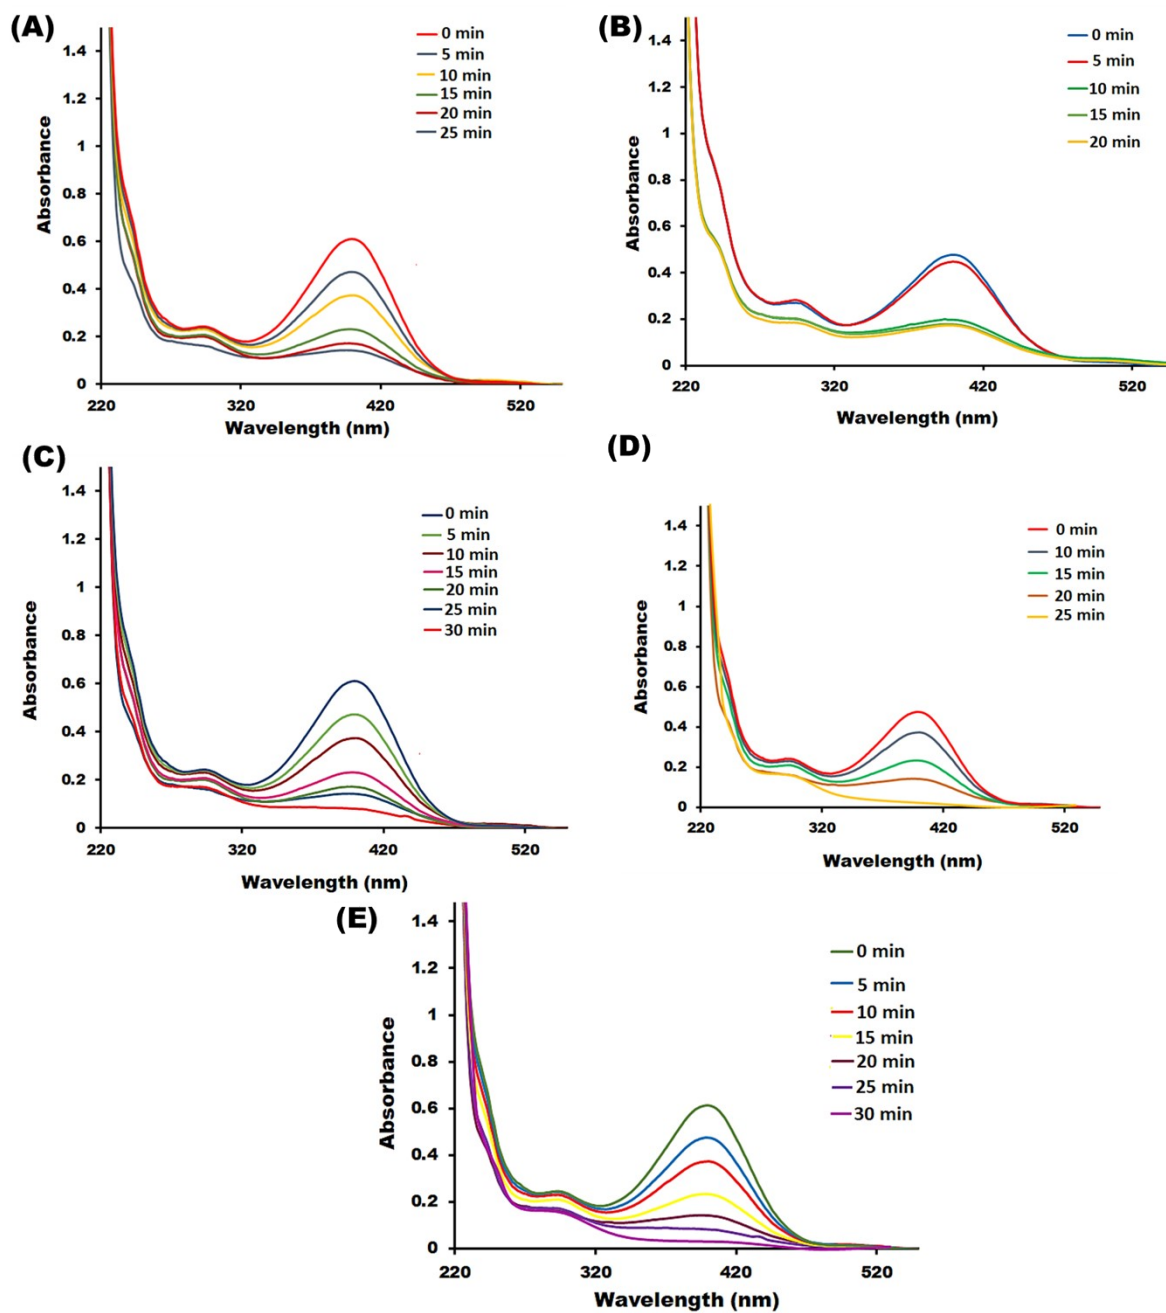

**Figure S17:** The time dependent UV–vis absorption spectra of 4-NP reduction step and the dependence of  $\ln(C/C_0)$  versus time plot for the pseudo-first-order reaction kinetics in the presence of nZVI-CALB@NM at 35 °C. UV-visible spectra of (A) p-nitrophenyl butyrate, (B) p-nitrophenyl chloroformate (C) p-nitrophenyl decanoate, (D) p-nitrophenyl octanoate and (E) p-nitrophenyl palmitate.

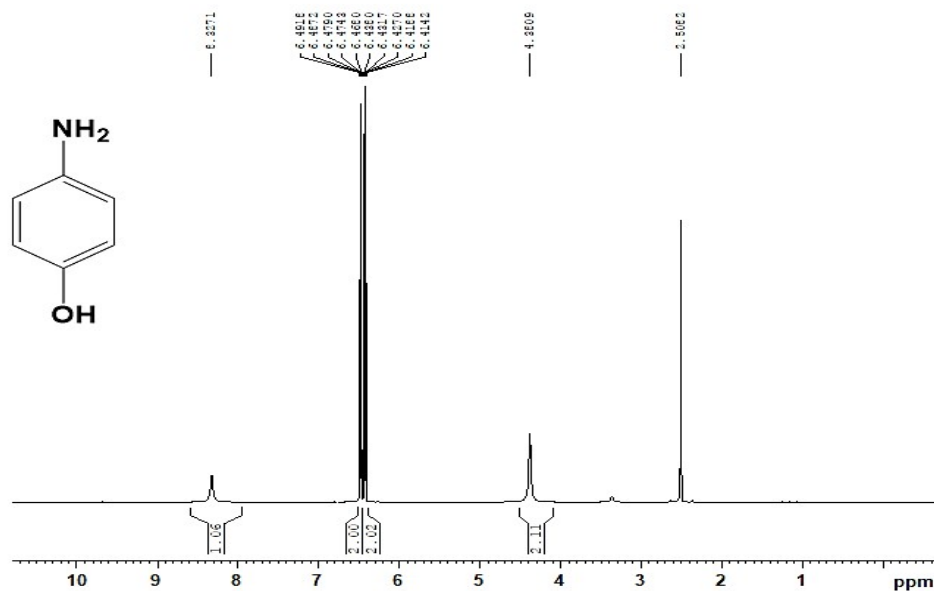

Figure S18: <sup>1</sup>H NMR of p-aminophenol

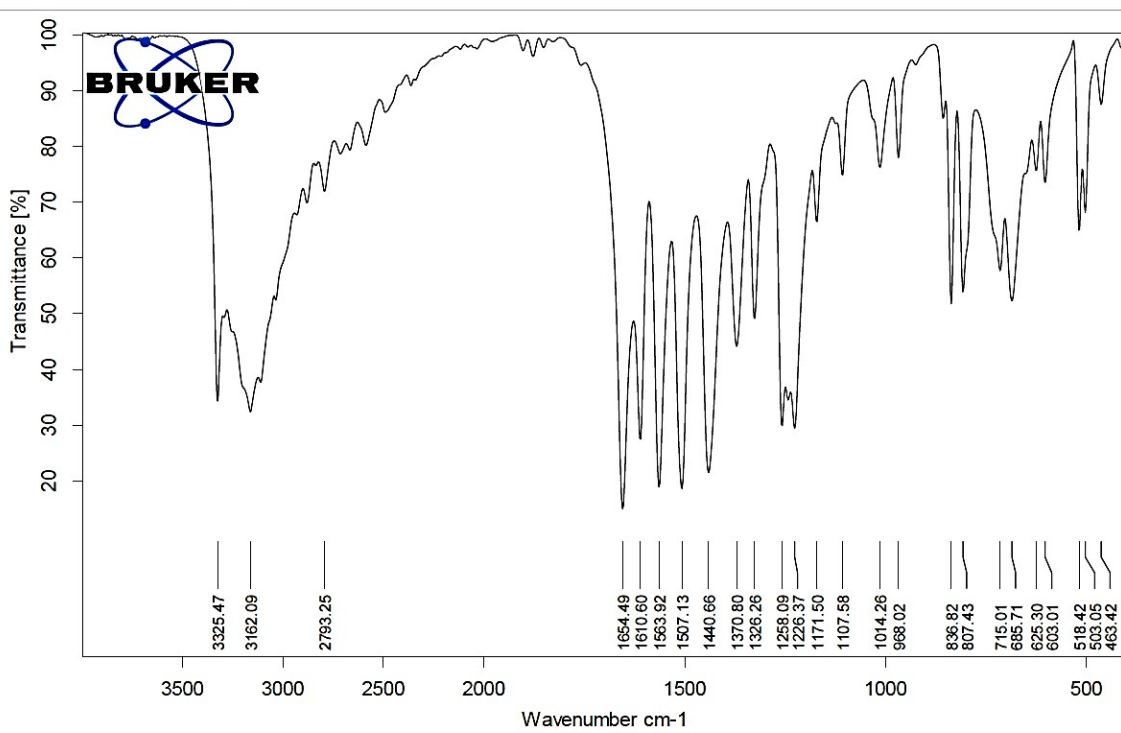

Figure S19: FTIR of p-acetaminophen

SP-L #68 RT: 2.20 AV: 1 NL: 1.03E6  
+ c Full ms [50.00-1000.00]

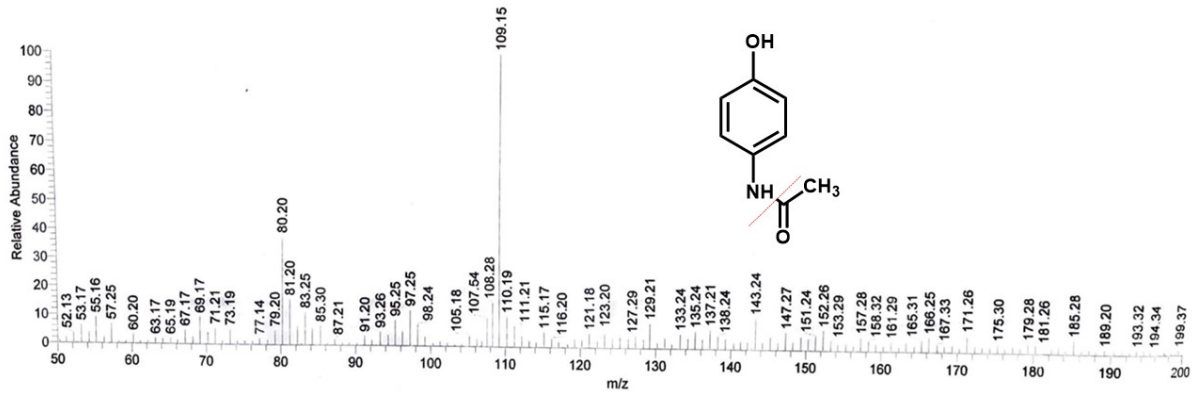

Figure S20: Mass analysis (DIP Mode) of p-acetaminophen

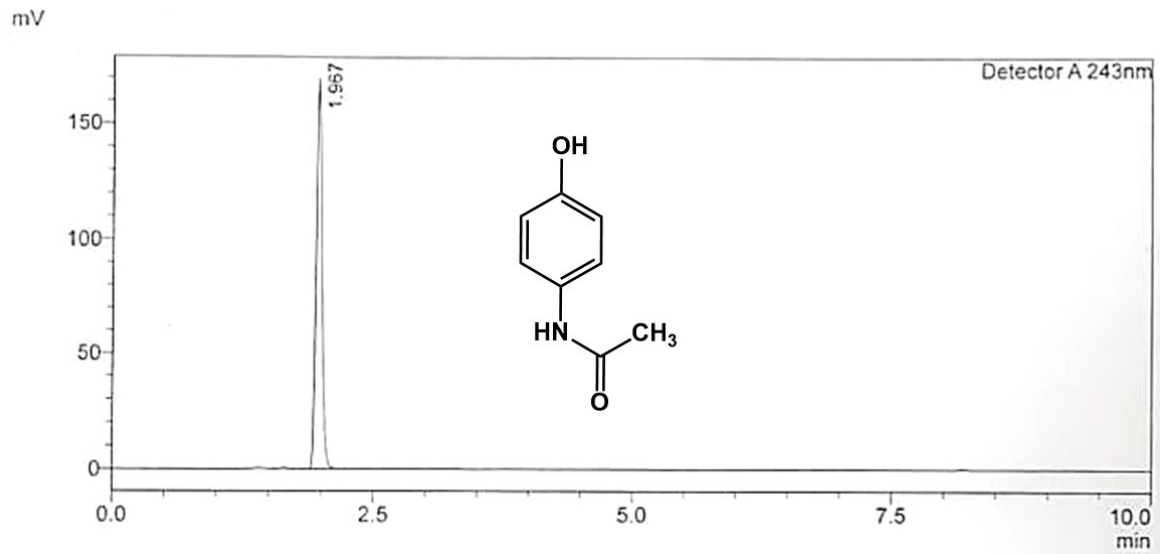

Figure S21: HPLC data of standard p-acetaminophen
